# Supplementary material for: Synergy of entry inhibitors with direct-acting antivirals uncovers novel combinations for prevention and treatment of hepatitis C
Source: PubMed Central journal article supplement — Gut. 2014 May 21;64(3):483–94. doi: 10.1136/gutjnl-2013-306155 (PMC4345833; doi:10.1136/gutjnl-2013-306155), 2014-05-21
Supplement: gutjnl-2013-306155-s1.pdf [file gutjnl-2013-306155-s1.pdf]

1 **Synergy of entry inhibitors with direct-acting antivirals uncovers**  
2 **novel combinations for prevention and treatment of hepatitis C**

3  
4 Fei Xiao, Isabel Fofana, Christine Thumann, Laurent Maily, Roxane Alles,

5 Eric Robinet, Nicolas Meyer, Mickaël Schaeffer, François Habersetzer,

6 Michel Doffoël, Pieter Leyssen, Johan Neyts, Mirjam B. Zeisel and

7 Thomas F. Baumert

8  
9 **SUPPLEMENTARY TABLES**

10 **Supplementary Table 1. Synergy of entry inhibitors and direct-acting antivirals on**

11 **inhibition of HCV infection.** Huh7.5.1 cells were pre-incubated with serial concentrations of

12 DAAs (protease inhibitors telaprevir, boceprevir, simeprevir or danoprevir; NS5A inhibitor

13 daclatasvir; or polymerase inhibitors mericitabine or sofosbuvir) and 0.01 µg/ml receptor-

14 specific (anti-CD81, anti-SR-BI or anti-CLDN1) or respective isotype control mAbs or 0.1 µM

15 PKIs (erlotinib or dasatinib) for 1h at 37°C. The mix was removed and Huh7.5.1 cells were

16 incubated for 4h at 37°C with HCVcc Luc-Jc1 in the presence of both compounds. HCVcc

17 infection was analyzed by luciferase reporter gene expression[1]. The Combination Index

18 (CI) at (A) IC<sub>50</sub>, (B) IC<sub>75</sub> and (C) IC<sub>90</sub> was calculated as described[2]. A CI less than 0.9,

19 between 0.9 and 1.1, and more than 1.1 indicates synergy, additivity, and antagonism,

20 respectively. Means [95% credible intervals] from three independent experiments performed

21 in triplicate are shown for the CI.

22

23

24

25

26

27

28

29

30

31

32

33

34

35

**A.**

| Compound 1   | IC <sub>50</sub><br>( $\mu\text{M}$ or $\text{nM}^1$ ) | Compound 2 | IC <sub>50</sub> ( $\mu\text{M}$ or $\text{nM}^1$ )<br>for combination | CI                |
|--------------|--------------------------------------------------------|------------|------------------------------------------------------------------------|-------------------|
| telaprevir   | 0.15 $\pm$ 0.06                                        | anti-CD81  | 0.004 $\pm$ 0.001                                                      | 0.53 [0.46-0.61]  |
|              |                                                        | anti-SR-BI | 0.015 $\pm$ 0.001                                                      | 0.11 [0.03-0.19]  |
|              |                                                        | anti-CLDN1 | 0.006 $\pm$ 0.003                                                      | 0.11 [0.03-0.18]  |
|              |                                                        | erlotinib  | 0.001 $\pm$ 0.002                                                      | 0.22 [0.14-0.30]  |
|              |                                                        | dasatinib  | 0.02 $\pm$ 0.03                                                        | 0.39 [0.30-0.46]  |
| boceprevir   | 0.14 $\pm$ 0.02                                        | anti-CD81  | 0.0004 $\pm$ 0.0001                                                    | 0.50 [0.42-0.58]  |
|              |                                                        | anti-SR-BI | 0.02 $\pm$ 0.002                                                       | 0.16 [0.08-0.24]  |
|              |                                                        | anti-CLDN1 | 0.0005 $\pm$ 0.001                                                     | 0.06 [-0.01-0.14] |
|              |                                                        | erlotinib  | 0.008 $\pm$ 0.004                                                      | 0.27 [0.19-0.35]  |
|              |                                                        | dasatinib  | 0.001 $\pm$ 0.0005                                                     | 0.26 [0.18-0.34]  |
| simeprevir   | 0.013 $\pm$ 0.001                                      | anti-CD81  | 0.0007 $\pm$ 0.0001                                                    | 0.56 [0.48-0.64]  |
|              |                                                        | anti-SR-BI | 0.006 $\pm$ 0.0007                                                     | 0.47 [0.39-0.55]  |
|              |                                                        | anti-CLDN1 | 0.0005 $\pm$ 0.0002                                                    | 0.1 [0.04-0.20]   |
|              |                                                        | erlotinib  | 0.005 $\pm$ 0.002                                                      | 0.59 [0.50-0.66]  |
|              |                                                        | dasatinib  | 0.0025 $\pm$ 0.002                                                     | 0.44 [0.36-0.52]  |
| danoprevir   | 0.006 $\pm$ 0.003                                      | anti-CD81  | 0.0006 $\pm$ 0.0004                                                    | 0.6 [0.53-0.68]   |
|              |                                                        | anti-SR-BI | 0.0007 $\pm$ 0.001                                                     | 0.13 [0.05-0.21]  |
|              |                                                        | anti-CLDN1 | 0.0003 $\pm$ 0.0004                                                    | 0.11 [0.03-0.19]  |
|              |                                                        | erlotinib  | 0.001 $\pm$ 0.0005                                                     | 0.37 [0.29-0.45]  |
|              |                                                        | dasatinib  | 0.0016 $\pm$ 0.0007                                                    | 0.52 [0.44-0.60]  |
| daclatasvir  | 0.012 $\pm$ 0.003                                      | anti-CD81  | N.A.                                                                   | N.A.              |
|              |                                                        | anti-SR-BI | 0.0002 $\pm$ 0.0004                                                    | 0.03 [-0.04-0.12] |
|              |                                                        | anti-CLDN1 | 0.0006 $\pm$ 0.0002                                                    | 0.11 [0.03-0.19]  |
|              |                                                        | erlotinib  | 0.0009 $\pm$ 0.0004                                                    | 0.28 [0.20-0.36]  |
|              |                                                        | dasatinib  | 0.002 $\pm$ 0.0008                                                     | 0.42 [0.34-0.49]  |
| mericitabine | 0.12 $\pm$ 0.03                                        | anti-CD81  | 0.00015 $\pm$ 0.0001                                                   | 0.50 [0.43-0.59]  |
|              |                                                        | anti-SR-BI | 0.019 $\pm$ 0.007                                                      | 0.17 [0.09-0.25]  |
|              |                                                        | anti-CLDN1 | 0.0028 $\pm$ 0.00035                                                   | 0.08 [0.01-0.17]  |
|              |                                                        | erlotinib  | 0.003 $\pm$ 0.006                                                      | 0.23 [0.16-0.32]  |
|              |                                                        | dasatinib  | 0.035 $\pm$ 0.01                                                       | 0.54 [0.46-0.62]  |
| sofosbuvir   | 0.021 $\pm$ 0.002                                      | anti-CD81  | 0.0006 $\pm$ 0.0004                                                    | 0.53 [0.45-0.61]  |
|              |                                                        | anti-SR-BI | 0.003 $\pm$ 0.0007                                                     | 0.15 [0.07-0.23]  |
|              |                                                        | anti-CLDN1 | 0.0012 $\pm$ 0.0003                                                    | 0.12 [0.04-0.20]  |
|              |                                                        | erlotinib  | 0.0001 $\pm$ 0.00002                                                   | 0.20 [0.13-0.29]  |
|              |                                                        | dasatinib  | 0.00029 $\pm$ 0.0001                                                   | 0.26 [0.18-0.34]  |

37 <sup>1</sup> Telaprevir, boceprevir, danoprevir, simeprevir, mericitabine, sofosbuvir:  $\mu\text{M}$ ; daclatasvir:  $\text{nM}$

38 IC<sub>50</sub> of individual entry inhibitors: anti-CD81, 0.02 $\pm$ 0.01  $\mu\text{g/ml}$ ; anti-SR-BI, 1.3 $\pm$ 0.4  $\mu\text{g/ml}$ ; anti-CLDN1,

39 0.18 $\pm$ 0.03  $\mu\text{g/ml}$ ; erlotinib, 0.5 $\pm$ 0.06  $\mu\text{M}$ ; dasatinib, 0.4 $\pm$ 0.3  $\mu\text{M}$ . N.A.: not applicable.

**B.**

| Compound 1   | IC <sub>75</sub><br>( $\mu\text{M}$ or $\text{nM}^1$ ) | Compound 2 | IC <sub>75</sub> ( $\mu\text{M}$ or $\text{nM}^1$ )<br>for combination | CI                |
|--------------|--------------------------------------------------------|------------|------------------------------------------------------------------------|-------------------|
| telaprevir   | 0.5 $\pm$ 0.15                                         | anti-CD81  | 0.1 $\pm$ 0.09                                                         | 0.35 [0.27-0.43]  |
|              |                                                        | anti-SR-BI | 0.2 $\pm$ 0.05                                                         | 0.4 [0.32-0.48]   |
|              |                                                        | anti-CLDN1 | 0.2 $\pm$ 0.02                                                         | 0.42 [0.34-0.50]  |
|              |                                                        | erlotinib  | 0.2 $\pm$ 0.05                                                         | 0.4 [0.32-0.48]   |
|              |                                                        | dasatinib  | 0.25 $\pm$ 0.05                                                        | 0.52 [0.44-0.60]  |
| boceprevir   | 0.4 $\pm$ 0.04                                         | anti-CD81  | 0.15 $\pm$ 0.04                                                        | 0.52 [0.44-0.60]  |
|              |                                                        | anti-SR-BI | 0.2 $\pm$ 0.02                                                         | 0.51 [0.43-0.59]  |
|              |                                                        | anti-CLDN1 | 0.06 $\pm$ 0.03                                                        | 0.17 [0.1-0.25]   |
|              |                                                        | erlotinib  | 0.15 $\pm$ 0.09                                                        | 0.4 [0.32-0.48]   |
|              |                                                        | dasatinib  | 0.15 $\pm$ 0.04                                                        | 0.4 [0.32-0.48]   |
| simeprevir   | 0.04 $\pm$ 0.01                                        | anti-CD81  | 0.02 $\pm$ 0.002                                                       | 0.65 [0.57-0.72]  |
|              |                                                        | anti-SR-BI | 0.03 $\pm$ 0.01                                                        | 0.74 [0.67-0.82]  |
|              |                                                        | anti-CLDN1 | 0.015 $\pm$ 0.003                                                      | 0.39 [0.31-0.47]  |
|              |                                                        | erlotinib  | 0.03 $\pm$ 0.005                                                       | 0.76 [0.69-0.84]  |
|              |                                                        | dasatinib  | 0.02 $\pm$ 0.002                                                       | 0.52 [0.44-0.60]  |
| danoprevir   | 0.045 $\pm$ 0.003                                      | anti-CD81  | 0.02 $\pm$ 0.006                                                       | 0.6 [0.52-0.68]   |
|              |                                                        | anti-SR-BI | 0.004 $\pm$ 0.002                                                      | 0.1 [0.02-0.18]   |
|              |                                                        | anti-CLDN1 | 0.0018 $\pm$ 0.0003                                                    | 0.07 [-0.01-0.15] |
|              |                                                        | erlotinib  | 0.02 $\pm$ 0.005                                                       | 0.47 [0.39-0.55]  |
|              |                                                        | dasatinib  | 0.01 $\pm$ 0.009                                                       | 0.25 [0.18-0.33]  |
| daclatasvir  | 0.045 $\pm$ 0.01                                       | anti-CD81  | 0.00025 $\pm$ 0.0002                                                   | 0.17 [0.01-0.24]  |
|              |                                                        | anti-SR-BI | 0.001 $\pm$ 0.0005                                                     | 0.04 [-0.04-0.12] |
|              |                                                        | anti-CLDN1 | 0.02 $\pm$ 0.01                                                        | 0.47 [0.39-0.55]  |
|              |                                                        | erlotinib  | 0.006 $\pm$ 0.004                                                      | 0.17 [0.09-0.24]  |
|              |                                                        | dasatinib  | 0.02 $\pm$ 0.006                                                       | 0.47 [0.39-0.55]  |
| mericitabine | 0.45 $\pm$ 0.05                                        | anti-CD81  | 0.03 $\pm$ 0.01                                                        | 0.22 [0.15-0.30]  |
|              |                                                        | anti-SR-BI | 0.2 $\pm$ 0.05                                                         | 0.45 [0.38-0.53]  |
|              |                                                        | anti-CLDN1 | 0.15 $\pm$ 0.05                                                        | 0.35 [0.28-0.43]  |
|              |                                                        | erlotinib  | 0.2 $\pm$ 0.04                                                         | 0.47 [0.39-0.55]  |
|              |                                                        | dasatinib  | 0.4 $\pm$ 0.05                                                         | 0.90 [0.82-0.98]  |
| sofosbuvir   | 0.07 $\pm$ 0.003                                       | anti-CD81  | 0.025 $\pm$ 0.005                                                      | 0.51 [0.43-0.59]  |
|              |                                                        | anti-SR-BI | 0.05 $\pm$ 0.03                                                        | 0.70 [0.63-0.78]  |
|              |                                                        | anti-CLDN1 | 0.03 $\pm$ 0.005                                                       | 0.45 [0.37-0.53]  |
|              |                                                        | erlotinib  | 0.002 $\pm$ 0.001                                                      | 0.07 [-0.01-0.15] |
|              |                                                        | dasatinib  | 0.025 $\pm$ 0.005                                                      | 0.38 [0.30-0.46]  |

41 <sup>1</sup> Telaprevir, boceprevir, danoprevir, simeprevir, mericitabine, sofosbuvir:  $\mu\text{M}$ ; daclatasvir:  $\text{nM}$   
42 IC<sub>75</sub> of individual entry inhibitors: anti-CD81, 0.065 $\pm$ 0.02  $\mu\text{g}/\text{ml}$ ; anti-SR-BI, 10 $\pm$ 0.3  $\mu\text{g}/\text{ml}$ ; anti-CLDN1,  
43 0.5 $\pm$ 0.06  $\mu\text{g}/\text{ml}$ ; erlotinib, 3.8 $\pm$ 0.2  $\mu\text{M}$ ; dasatinib, 4 $\pm$ 0.8  $\mu\text{M}$ .

**C.**

| Compound 1   | IC <sub>90</sub><br>( $\mu\text{M}$ or $\text{nM}^1$ ) | Compound 2 | IC <sub>90</sub> ( $\mu\text{M}$ or $\text{nM}^1$ )<br>for combination | CI                |
|--------------|--------------------------------------------------------|------------|------------------------------------------------------------------------|-------------------|
| telaprevir   | 1 $\pm$ 0.2                                            | anti-CD81  | 0.45 $\pm$ 0.05                                                        | 0.48 [0.38-0.59]  |
|              |                                                        | anti-SR-BI | N.A.                                                                   | N.A.              |
|              |                                                        | anti-CLDN1 | 0.6 $\pm$ 0.09                                                         | 0.61 [0.50-0.71]  |
|              |                                                        | erlotinib  | 0.5 $\pm$ 0.1                                                          | 0.5 [0.40-0.61]   |
|              |                                                        | dasatinib  | 0.6 $\pm$ 0.1                                                          | 0.61 [0.50-0.71]  |
| boceprevir   | 0.7 $\pm$ 0.04                                         | anti-CD81  | 0.4 $\pm$ 0.1                                                          | 0.6 [0.49-0.70]   |
|              |                                                        | anti-SR-BI | N.A.                                                                   | N.A.              |
|              |                                                        | anti-CLDN1 | 0.35 $\pm$ 0.05                                                        | 0.51 [0.41-0.62]  |
|              |                                                        | erlotinib  | 0.5 $\pm$ 0.13                                                         | 0.71 [0.61-0.82]  |
|              |                                                        | dasatinib  | 0.4 $\pm$ 0.05                                                         | 0.58 [0.48-0.68]  |
| simeprevir   | 0.08 $\pm$ 0.02                                        | anti-CD81  | 0.05 $\pm$ 0.01                                                        | 0.65 [0.54-0.75]  |
|              |                                                        | anti-SR-BI | N.A.                                                                   | N.A.              |
|              |                                                        | anti-CLDN1 | 0.05 $\pm$ 0.01                                                        | 0.64 [0.53-0.74]  |
|              |                                                        | erlotinib  | 0.05 $\pm$ 0.017                                                       | 0.63 [0.52-0.73]  |
|              |                                                        | dasatinib  | 0.05 $\pm$ 0.03                                                        | 0.64 [0.53-0.74]  |
| danoprevir   | 0.2 $\pm$ 0.02                                         | anti-CD81  | 0.08 $\pm$ 0.02                                                        | 0.43 [0.33-0.54]  |
|              |                                                        | anti-SR-BI | N.A.                                                                   | N.A.              |
|              |                                                        | anti-CLDN1 | 0.006 $\pm$ 0.001                                                      | 0.06 [-0.05-0.17] |
|              |                                                        | erlotinib  | 0.06 $\pm$ 0.01                                                        | 0.32 [0.21-0.42]  |
|              |                                                        | dasatinib  | 0.04 $\pm$ 0.03                                                        | 0.22 [0.12-0.33]  |
| daclatasvir  | 0.09 $\pm$ 0.005                                       | anti-CD81  | 0.02 $\pm$ 0.01                                                        | 0.27 [0.17-0.38]  |
|              |                                                        | anti-SR-BI | N.A.                                                                   | N.A.              |
|              |                                                        | anti-CLDN1 | 0.08 $\pm$ 0.01                                                        | 0.89 [0.78-0.99]  |
|              |                                                        | erlotinib  | 0.03 $\pm$ 0.01                                                        | 0.35 [0.24-0.45]  |
|              |                                                        | dasatinib  | 0.06 $\pm$ 0.01                                                        | 0.67 [0.57-0.78]  |
| mericitabine | 1.5 $\pm$ 0.2                                          | anti-CD81  | 0.2 $\pm$ 0.1                                                          | 0.18 [0.08-0.29]  |
|              |                                                        | anti-SR-BI | N.A.                                                                   | N.A.              |
|              |                                                        | anti-CLDN1 | 0.4 $\pm$ 0.1                                                          | 0.28 [0.19-0.40]  |
|              |                                                        | erlotinib  | 0.7 $\pm$ 0.15                                                         | 0.47 [0.37-0.58]  |
|              |                                                        | dasatinib  | 1 $\pm$ 0.1                                                            | 0.68 [0.57-0.78]  |
| sofosbuvir   | 0.25 $\pm$ 0.02                                        | anti-CD81  | 0.1 $\pm$ 0.08                                                         | 0.43 [0.33-0.54]  |
|              |                                                        | anti-SR-BI | N.A.                                                                   | N.A.              |
|              |                                                        | anti-CLDN1 | 0.1 $\pm$ 0.05                                                         | 0.41 [0.31-0.52]  |
|              |                                                        | erlotinib  | 0.1 $\pm$ 0.03                                                         | 0.41 [0.31-0.52]  |
|              |                                                        | dasatinib  | 0.15 $\pm$ 0.06                                                        | 0.61 [0.50-0.71]  |

46 <sup>1</sup> Telaprevir, boceprevir, danoprevir, simeprevir, mericitabine, sofosbuvir:  $\mu\text{M}$ ; daclatasvir:  $\text{nM}$   
47 IC<sub>90</sub> of individual entry inhibitors: anti-CD81, 0.3 $\pm$ 0.2  $\mu\text{g/ml}$ ; anti-CLDN1, 0.8 $\pm$ 0.05  $\mu\text{g/ml}$ ; erlotinib,  
48 10 $\pm$ 0.6  $\mu\text{M}$ ; dasatinib, 10 $\pm$ 0.7  $\mu\text{M}$ . N.A.: not applicable.

49 **Supplementary Table 2. Synergy of host-targeting agents on the inhibition of HCV**  
50 **infection.** Huh7.5.1 cells were pre-incubated with (A) serial dilutions of receptor-specific  
51 (anti-CD81, anti-SR-BI or anti-CLDN1) mAbs or respective isotype control mAbs and 0.1  $\mu$ M  
52 PKIs (erlotinib or dasatinib); or with (B) serial concentrations of alisporivir and 0.01  $\mu$ g/ml of  
53 receptor-specific (anti-CD81, anti-SR-BI or anti-CLDN1) mAbs or 0.1  $\mu$ M PKIs (erlotinib or  
54 dasatinib) for 1h at 37°C. HCVcc infection was carried out and analyzed and the CI at (A)  
55  $IC_{50}$ , (B)  $IC_{75}$  and (C)  $IC_{90}$  was calculated as described in supplementary table 1. Means  
56 [95% credible intervals] from three independent experiments performed in triplicate are  
57 shown for the CI.  $IC_{50}$  of individual entry inhibitors: anti-CD81,  $0.02\pm 0.01$   $\mu$ g/ml; anti-SR-BI,  
58  $1.3\pm 0.4$   $\mu$ g/ml; anti-CLDN1,  $0.18\pm 0.03$   $\mu$ g/ml; erlotinib,  $0.5\pm 0.06$   $\mu$ M; dasatinib,  $0.4\pm 0.3$   $\mu$ M.

59

60 **A.**

| Compound 1 | $IC_{50}$<br>( $\mu$ g/ml or<br>$\mu$ M) | Compound 2 | $IC_{50}$ ( $\mu$ g/ml)<br>for combination | CI               |
|------------|------------------------------------------|------------|--------------------------------------------|------------------|
| anti-CD81  | 0.02 $\pm$ 0.01                          | erlotinib  | 0.0025 $\pm$ 0.007                         | 0.33 [0.25-0.41] |
|            |                                          | dasatinib  | 0.0029 $\pm$ 0.002                         | 0.44 [0.36-0.52] |
|            |                                          | anti-SR-BI | 0.0006 $\pm$ 0.0003                        | 0.4 [0.32-0.48]  |
| anti-SR-BI | 1.3 $\pm$ 0.4                            | erlotinib  | 0.002 $\pm$ 0.001                          | 0.21 [0.13-0.29] |
|            |                                          | dasatinib  | 0.015 $\pm$ 0.007                          | 0.26 [0.18-0.34] |
| anti-CLDN1 | 0.18 $\pm$ 0.03                          | erlotinib  | 0.005 $\pm$ 0.03                           | 0.24 [0.16-0.32] |
|            |                                          | dasatinib  | 0.005 $\pm$ 0.003                          | 0.28 [0.20-0.36] |
|            |                                          | anti-SR-BI | 0.014 $\pm$ 0.005                          | 0.09 [0.01-0.17] |
|            |                                          | anti-CD81  | 0.086 $\pm$ 0.002                          | 0.85 [0.77-0.93] |
| erlotinib  | 0.5 $\pm$ 0.06                           | dasatinib  | 0.027 $\pm$ 0.005                          | 0.3 [0.22-0.38]  |

| Compound 1  | IC <sub>50</sub> (μM) | Compound 2 | IC <sub>50</sub> (μM) for combination | CI                |
|-------------|-----------------------|------------|---------------------------------------|-------------------|
| alisporivir | 2.2±0.5               | anti-CD81  | 0.00045±0.0004                        | 0.50 [0.42-0.57]  |
|             |                       | anti-SR-BI | 0.31±0.02                             | 0.15 [0.07-0.23]  |
|             |                       | anti-CLDN1 | 0.0007±0.0006                         | 0.06 [-0.02-0.14] |
|             |                       | erlotinib  | 0.0007±0.006                          | 0.20 [-0.01-0.28] |
|             |                       | dasatinib  | 0.048±0.01                            | 0.28 [0.21-0.36]  |

78 IC<sub>50</sub> of individual entry inhibitors: erlotinib, 0.5±0.06 μM; dasatinib, 0.4±0.3 μM.

79

80

81 **B.**

| Compound 1 | IC <sub>75</sub> (μg/ml or μM) | Compound 2 | IC <sub>75</sub> (μg/ml) for combination | CI                |
|------------|--------------------------------|------------|------------------------------------------|-------------------|
| anti-CD81  | 0.065±0.02                     | erlotinib  | 0.04±0.009                               | 0.64 [0.56-0.71]  |
|            |                                | dasatinib  | 0.03±0.01                                | 0.49 [0.41-0.57]  |
|            |                                | anti-SR-BI | 0.004±0.002                              | 0.06 [-0.02-0.14] |
| anti-SR-BI | 10±0.3                         | erlotinib  | 0.06±0.01                                | 0.04 [-0.04-0.12] |
|            |                                | dasatinib  | 0.4±0.09                                 | 0.08 [-0.01-0.16] |
| anti-CLDN1 | 0.5±0.06                       | erlotinib  | 0.15±0.1                                 | 0.32 [0.24-0.40]  |
|            |                                | dasatinib  | 0.025±0.015                              | 0.09 [0.01-0.17]  |
|            |                                | anti-SR-BI | 0.2±0.06                                 | 0.4 [0.32-0.48]   |
| erlotinib  | 3.8±0.2                        | dasatinib  | 1.8±0.3                                  | 0.78 [0.7-0.86]   |

| Compound 1  | IC <sub>75</sub> (μM) | Compound 2 | IC <sub>75</sub> (μM) for combination | CI               |
|-------------|-----------------------|------------|---------------------------------------|------------------|
| alisporivir | 10±2                  | anti-CD81  | 1.5±0.5                               | 0.3 [0.23-0.38]  |
|             |                       | anti-SR-BI | 7±1                                   | 0.69 [0.62-0.77] |
|             |                       | anti-CLDN1 | 1.8±0.4                               | 0.20 [0.12-0.27] |
|             |                       | erlotinib  | 1.5±0.9                               | 0.19 [0.11-0.27] |
|             |                       | dasatinib  | 4±1                                   | 0.43 [0.35-0.51] |

94 IC<sub>75</sub> of individual entry inhibitors: erlotinib, 3.8±0.2 μM; dasatinib, 4±0.8 μM.

95

96

97

| Compound 1 | IC <sub>90</sub><br>(µg/ml or µM) | Compound 2 | IC <sub>90</sub> (µg/ml)<br>for combination | CI               | 99  |
|------------|-----------------------------------|------------|---------------------------------------------|------------------|-----|
| anti-CD81  | 0.3±0.2                           | erlotinib  | 0.2±0.09                                    | 0.68 [0.57-0.78] |     |
|            |                                   | dasatinib  | 0.08±0.04                                   | 0.27 [0.18-0.38] | 100 |
|            |                                   | anti-SR-BI | N.A.                                        | N.A.             |     |
| anti-SR-BI | N.A.                              | erlotinib  | N.A.                                        | N.A.             | 101 |
|            |                                   | dasatinib  | N.A.                                        | N.A.             |     |
| anti-CLDN1 | 0.8±0.05                          | erlotinib  | 0.5±0.09                                    | 0.64 [0.53-0.74] |     |
|            |                                   | dasatinib  | 0.08±0.02                                   | 0.13 [0.02-0.23] | 102 |
|            |                                   | anti-CD81  | 0.75±0.05                                   | 0.95 [0.85-1.06] |     |
|            |                                   | anti-SRBI  | N.A.                                        | N.A.             | 103 |
| erlotinib  | 10±0.6                            | dasatinib  | 7.7±1.0                                     | 0.78 [0.88-0.68] | 104 |
|            |                                   |            |                                             |                  | 105 |

106 IC<sub>90</sub> of individual entry inhibitors: anti-CD81, 0.3±0.2 µg/ml; anti-CLDN1, 0.8±0.05 µg/ml; erlotinib,  
 107 10±0.6 µM; dasatinib, 10±0.7 µM. N.A.: not applicable.

108

109

110

111



112 **Supplementary Table 3. Synergy of entry inhibitors and IFN- $\alpha$ 2a or IFN- $\alpha$ 2b on**  
 113 **inhibition of HCV infection.** Huh7.5.1 cells were pre-incubated with serial concentrations of  
 114 IFN- $\alpha$ 2a or IFN- $\alpha$ 2b and 0.01  $\mu$ g/ml of receptor-specific (anti-CD81, anti-SR-BI or anti-  
 115 CLDN1) or respective isotype control mAbs for 1h at 37°C. Means  $\pm$  SD from at least three  
 116 independent experiments performed in triplicate are shown. HCVcc infection was carried out  
 117 and analyzed and the CI at (A) IC<sub>50</sub>, (B) IC<sub>75</sub> and (C) IC<sub>90</sub> was calculated as described in  
 118 supplementary table 1. Means [95% credible intervals] from three independent experiments  
 119 performed in triplicate are shown for the CI.

120 **A.**

| Compound 1       | IC <sub>50</sub> (UI/ml) | Compound 2 | IC <sub>50</sub> (UI/ml) for combination | CI               |
|------------------|--------------------------|------------|------------------------------------------|------------------|
| IFN- $\alpha$ 2a | 0.3 $\pm$ 0.16           | anti-CD81  | 0.032 $\pm$ 0.001                        | 0.60 [0.53-0.69] |
|                  |                          | anti-SR-BI | 0.08 $\pm$ 0.04                          | 0.27 [0.19-0.36] |
|                  |                          | anti-CLDN1 | 0.02 $\pm$ 0.01                          | 0.13 [0.06-0.22] |
| IFN- $\alpha$ 2b | 0.2 $\pm$ 0.05           | anti-CD81  | 0.035 $\pm$ 0.01                         | 0.67 [0.59-0.75] |
|                  |                          | anti-SR-BI | 0.07 $\pm$ 0.04                          | 0.36 [0.29-0.45] |
|                  |                          | anti-CLDN1 | 0.02 $\pm$ 0.05                          | 0.17 [0.09-0.25] |

130 IC<sub>50</sub> of individual receptor-specific mAbs: anti-CD81, 0.02 $\pm$ 0.01  $\mu$ g/ml; anti-SR-BI, 1.3 $\pm$ 0.4  $\mu$ g/ml; anti-  
 131 CLDN1, 0.18 $\pm$ 0.03  $\mu$ g/ml.

132

133

134

135

136 **B.**

| Compound 1 | IC <sub>75</sub> (UI/ml) | Compound 2 | IC <sub>75</sub> (UI/ml) for combination | CI               |
|------------|--------------------------|------------|------------------------------------------|------------------|
| IFN-α2a    | 1±0.7                    | anti-CD81  | 0.5±0.09                                 | 0.65 [0.56-0.72] |
|            |                          | anti-SR-BI | 0.6±0.05                                 | 0.6 [0.52-0.67]  |
|            |                          | anti-CLDN1 | 0.3±0.1                                  | 0.32 [0.24-0.40] |
| IFN-α2b    | 0.7±0.07                 | anti-CD81  | 0.3±0.1                                  | 0.58 [0.50-0.66] |
|            |                          | anti-SR-BI | 0.4±0.05                                 | 0.57 [0.49-0.65] |
|            |                          | anti-CLDN1 | 0.3±0.05                                 | 0.44 [0.36-0.52] |

146 IC<sub>75</sub> of individual receptor-specific mAbs: anti-CD81, 0.065±0.02 µg/ml; anti-SR-BI, 10±0.3 µg/ml; anti-  
 147 CLDN1, 0.5±0.06 µg/ml.

148

149 **C.**

| Compound 1 | IC <sub>90</sub> (UI/ml) | Compound 2 | IC <sub>90</sub> (UI/ml) for combination | CI               |
|------------|--------------------------|------------|------------------------------------------|------------------|
| IFN-α2a    | 5±09                     | anti-CD81  | 2±0.17                                   | 0.43 [0.33-0.54] |
|            |                          | anti-SR-BI | N.A.                                     | N.A.             |
|            |                          | anti-CLDN1 | 0.7±0.18                                 | 0.16 [0.06-0.27] |
| IFN-α2b    | 2±0.2                    | anti-CD81  | 1±0.26                                   | 0.53 [0.43-0.64] |
|            |                          | anti-SR-BI | N.A.                                     | N.A.             |
|            |                          | anti-CLDN1 | 1±0.43                                   | 0.51 [0.41-0.62] |

159 IC<sub>90</sub> of individual receptor-specific mAbs: anti-CD81, 0.3±0.2 µg/ml; anti-CLDN1, 0.8±0.05 µg/ml. N.A.:  
 160 not applicable.

161

162

163

164

165

166 **SUPPLEMENTARY FIGURE LEGEND**

167 **Supplementary Figure 1. Antiviral activity of IFN- $\alpha$  and entry inhibitors in combination.**

168 Huh7.5.1 cells were pre-incubated for 1h with serial concentrations of (A) IFN- $\alpha$ 2a or (B) IFN-  
169  $\alpha$ 2b and 0.01  $\mu$ g/ml of receptor-specific (anti-CD81, anti-SR-BI, anti-CLDN1) mAbs before  
170 incubation with HCVcc Luc-Jc1 in the presence of both compounds. HCVcc infection was  
171 analyzed by luciferase activity as described[1] (A-B) The CIs at IC<sub>50</sub>, IC<sub>75</sub> and IC<sub>90</sub> are  
172 indicated in Supporting Table 3. Dotted lines at combination values of 0.9 and 1.1 indicate  
173 the boundaries of additivity. Means  $\pm$  95% credible intervals from at least three independent  
174 experiments performed in triplicate are shown. (C-D) Combination of IFN- $\alpha$ 2a or IFN- $\alpha$ 2b  
175 with anti-CLDN1 mAb. (E-F) Synergy was confirmed using the method of Prichard and  
176 Shipman[3].

177

178

179

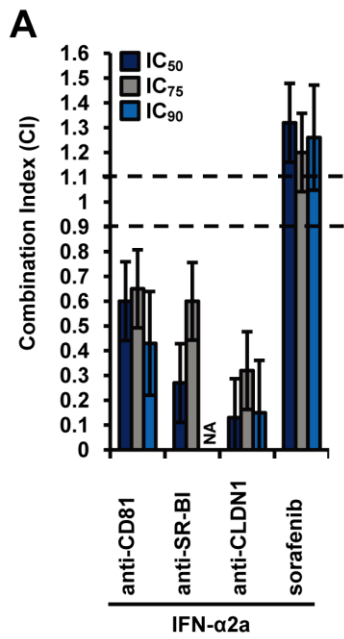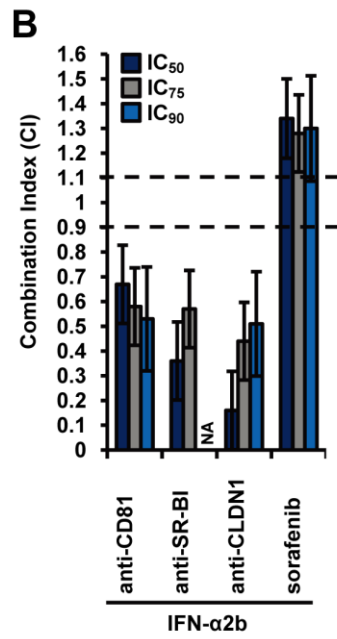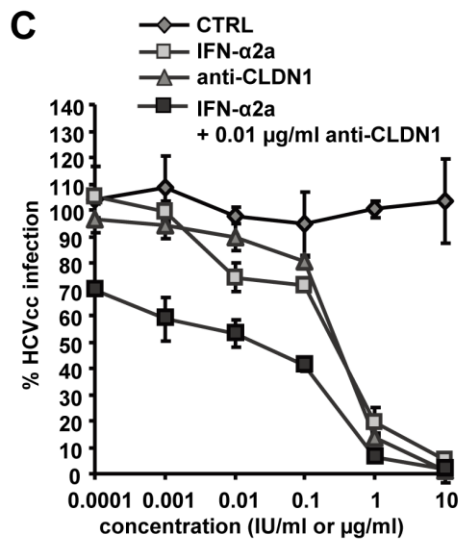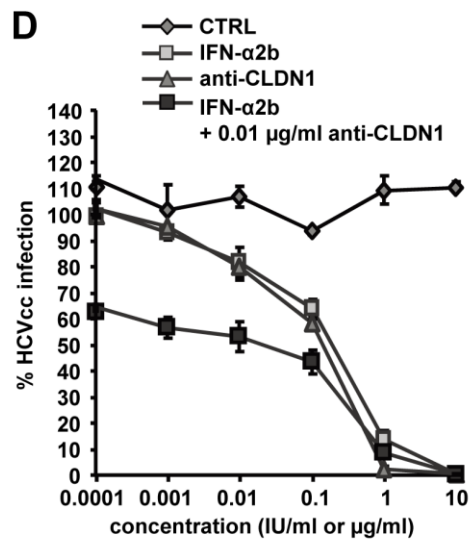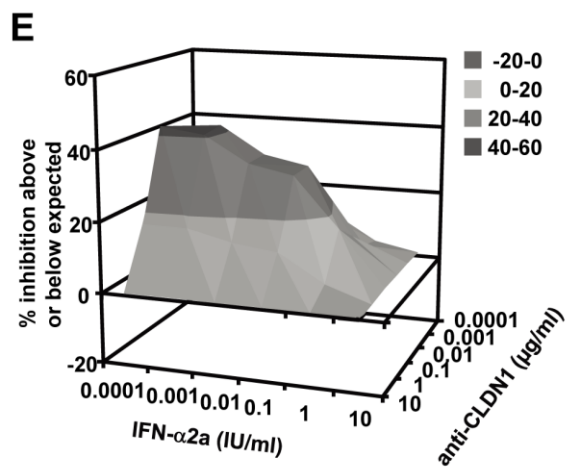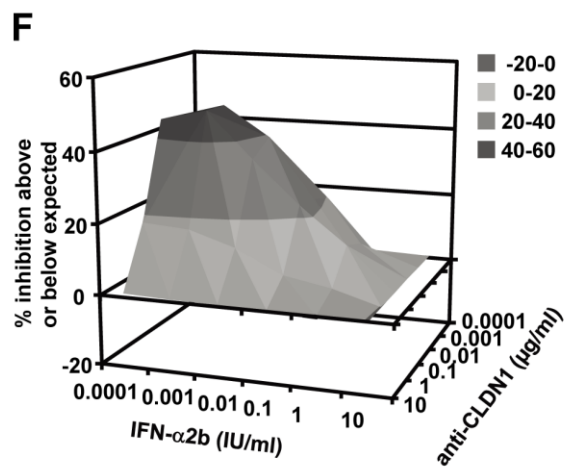

Supplementary Figure 1

180

181

182

## SUPPLEMENTARY REFERENCES

- 183 1. Fofana I, Krieger SE, Grunert F, et al. Monoclonal anti-claudin 1 antibodies for  
184 prevention of hepatitis C virus infection. *Gastroenterology*. 2010;**139**:953-64, 64.e1-4.
- 185 2. Zhao L, Wientjes MG, Au JL. Evaluation of combination chemotherapy: integration of  
186 nonlinear regression, curve shift, isobologram, and combination index analyses. *Clin Cancer*  
187 *Res*. 2004;**10**:7994-8004.
- 188 3. Prichard MN, Shipman C, Jr. A three-dimensional model to analyze drug-drug  
189 interactions. *Antiviral Res*. 1990;**14**:181-205.

190

191
